# Supplementary material for: Simulating Metaphyseal Fracture Healing in the Distal Radius
Source: MDPI journal article supplement (doi:10.3390/biomechanics1010003), 2021-02-25

# Supplementary Material to: Simulating Metaphyseal Fracture Healing in the Distal Radius

Lucas Engelhardt, Frank Niemeyer, Patrik Christen, Ralph Müller, Kerstin Stock, Michael Blauth, Karsten Urban, Anita Ignatius, Ulrich Simon

Patient A:

female, 51 years, fracture type: A2.1, Radius: T-score: -1.00 Z-Score: -0.30, BMD: 0.52

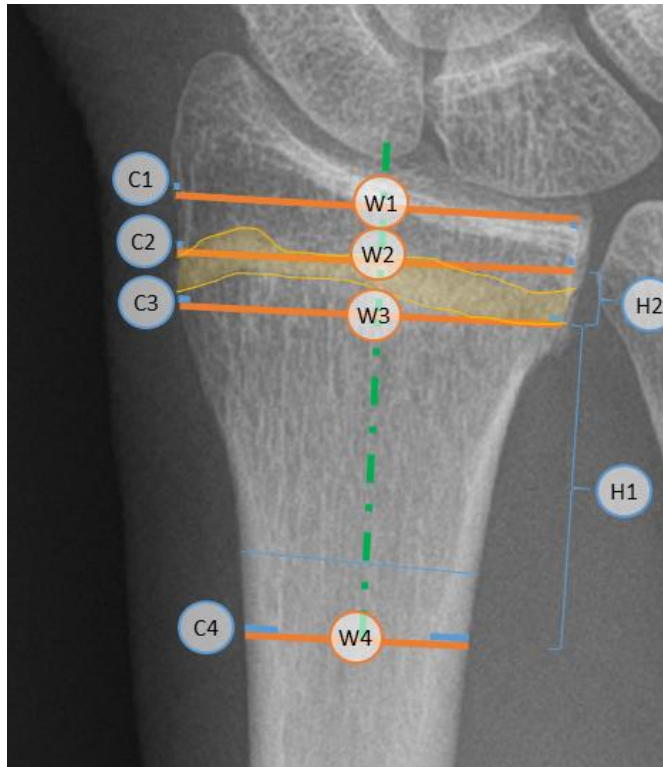

C1: 0.61,  
C2: 1.14,  
C3: 0.78,  
C4: 2.67,  
H1: 2.89,  
H2: 23.09,  
W1: 14.95,  
W2: 10.50,  
W3: 13.28,  
W4: 7.73

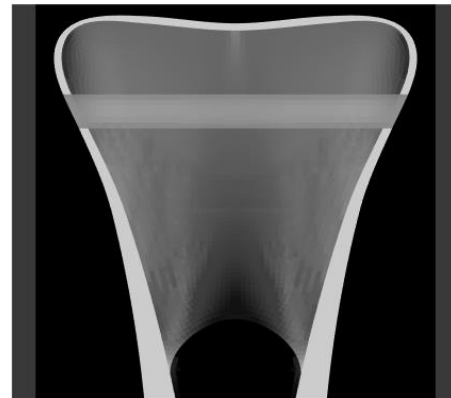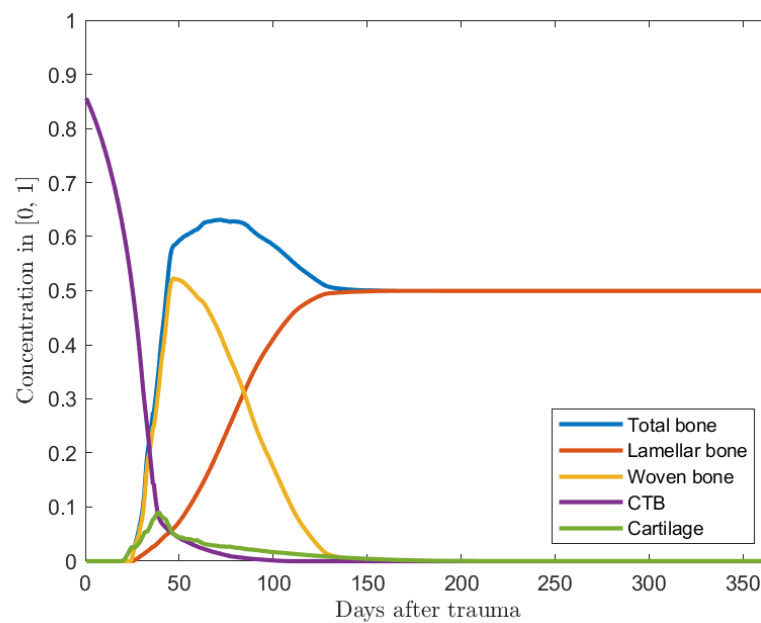

Patient B:

female, 86 years, fracture type: C1.1, Radius: T-Score: -1.90, Z-Score: -0.30, BMD: 0.48

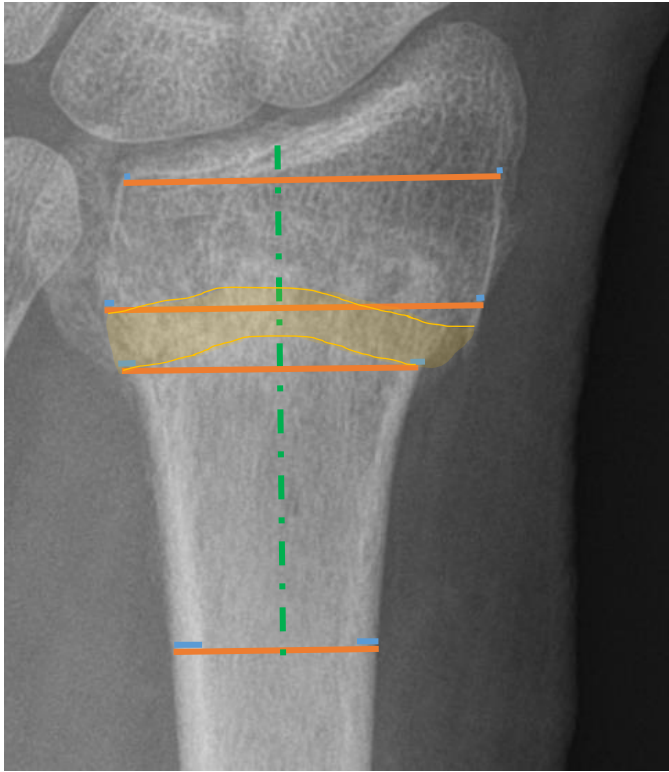

C1: 0.7,  
C2: 1.25,  
C3: 1.1,  
C4: 1.7,  
H1: 1.63,  
H2: 21.8,  
W1: 13.45,  
W2: 9.25,  
W3: 12,  
W4: 7.1

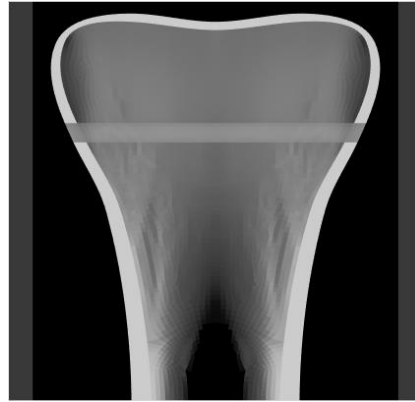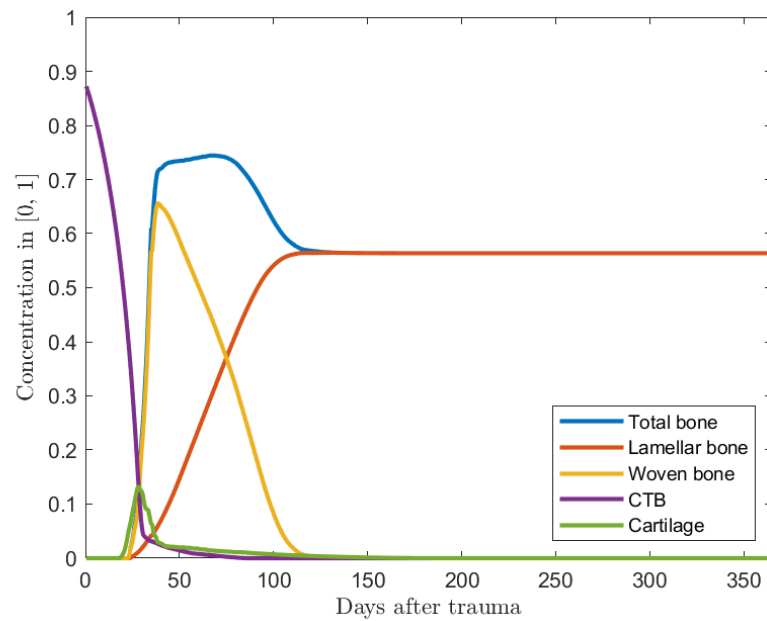

Patient C:

male, 33 years, fracture type: A2.1, Radius: T-Score: -0.90, Z-Score: -0.70, BMD: 0.53

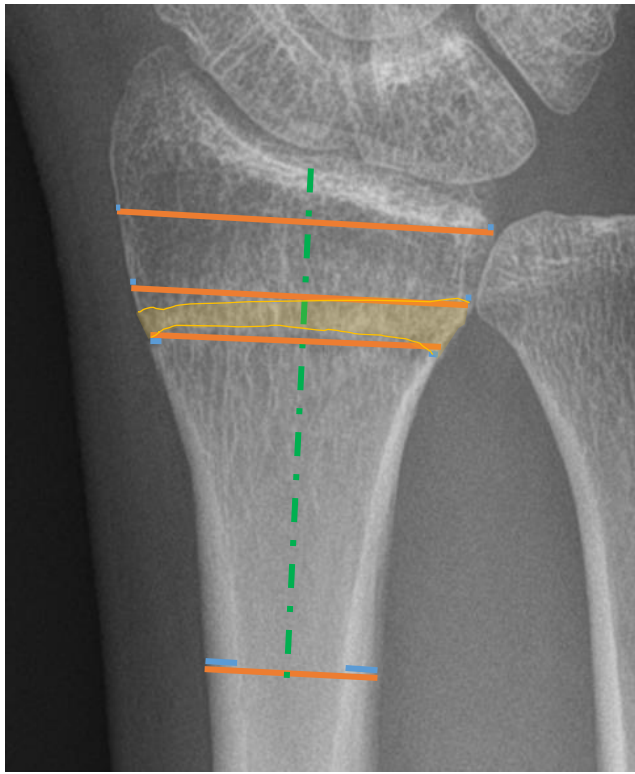

C1: 0.40,  
C2: 0.84,  
C3: 0.76,  
C4: 2.16,  
H1: 1.62,  
H2: 21.14,  
W1: 15.03,  
W2: 9.51,  
W3: 11.65,  
W4: 5.95

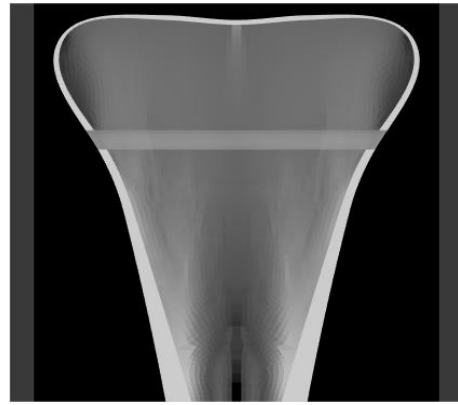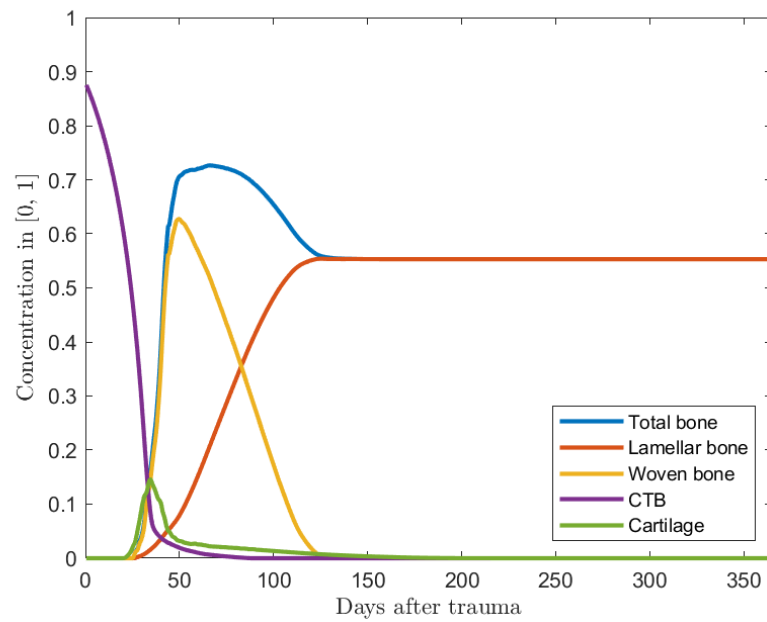

Patient D:

male, 45 years, fracture type: A2.1, Radius: T-Score: -1.90, Z-Score: -1.60, BMD: 0.59

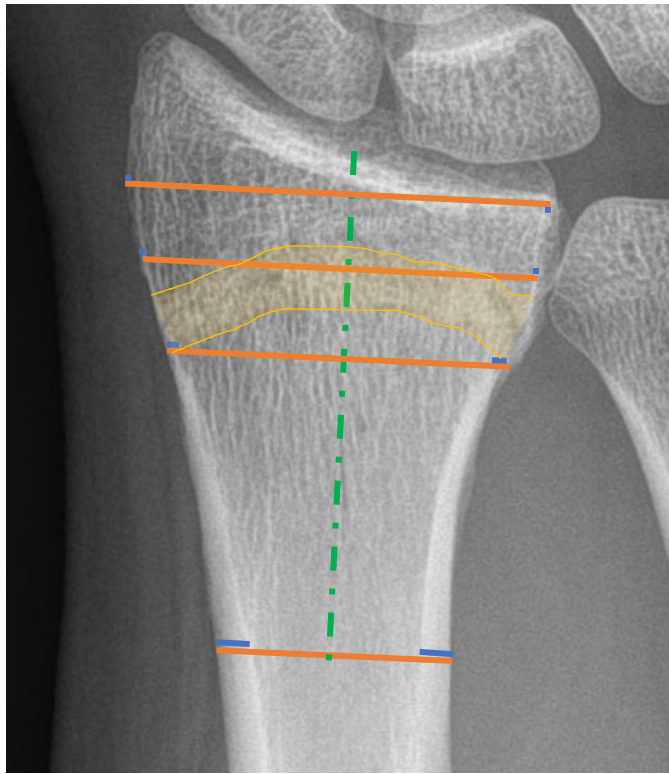

C1: 0.5,  
C2: 1.1,  
C3: 0.64,  
C4: 2.5,  
H1: 4.4,  
H2: 23.3,  
W1: 14.15,  
W2: 11.35,  
W3: 13.8,  
W4: 9

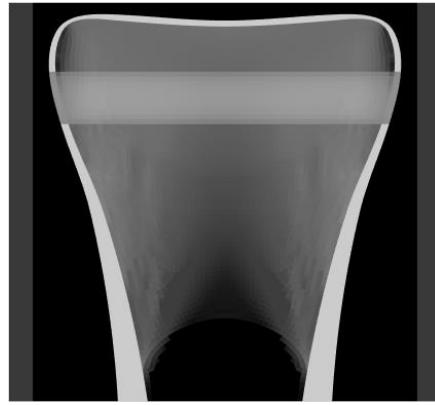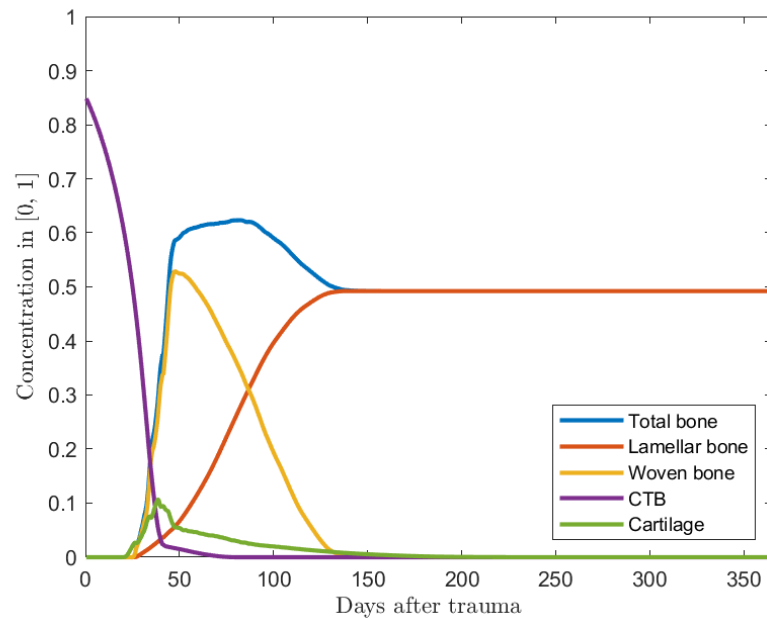

Supplement: s1 [file s1]
